# Supplementary material for: Vortex fluidic-mediated transesterification enhancement of mongongo fatty acid ethyl ester production for haircare applications
Source: Royal Society of Chemistry journal article supplement (doi:10.1039/d4su00763h), 2025-01-01
Supplement: d4su00763h1.pdf [file d4su00763h1.pdf]

## Supporting information for

### Vortex Fluidic-Mediated Transesterification Enhancement of Mongongo Fatty Acid Ethyl Ester Production for Haircare Applications

Xuejiao Cao<sup>a</sup>, Xuan Luo<sup>a</sup>, Safira M. Barros<sup>a</sup>, Wenjin Xing<sup>a</sup>, Melanie MacGregor<sup>a</sup>, Iliana Delcheva<sup>a</sup>, Jonathan Campbell<sup>a</sup>, Shan He<sup>a,b</sup>, Bradley P. Kirk<sup>c</sup>, Youhong Tang<sup>a</sup>, Colin L. Raston<sup>a\*</sup>

<sup>a</sup> Flinders Institute for Nanoscale Science and Technology, College of Science and Engineering, Flinders University, Adelaide, 5042, Australia

<sup>b</sup> School of Food and Pharmacy, Zhejiang Ocean University, Zhejiang, 316022, China

<sup>c</sup> Institute for Photonic and Advanced Sensing, School of Physics, Chemistry and Earth Science, University of Adelaide, South Australia 5005, Australia

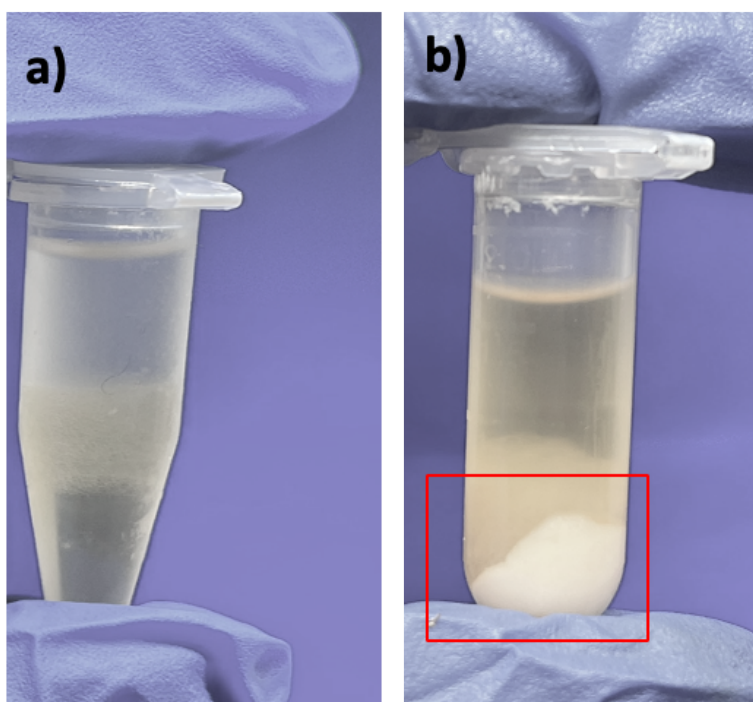

**Figure S1.** Comparison of Mongongo FAEE processed via VFD and conventional method. a). VFD product after being washed with water. b). Traditional product of method after being washed with water.

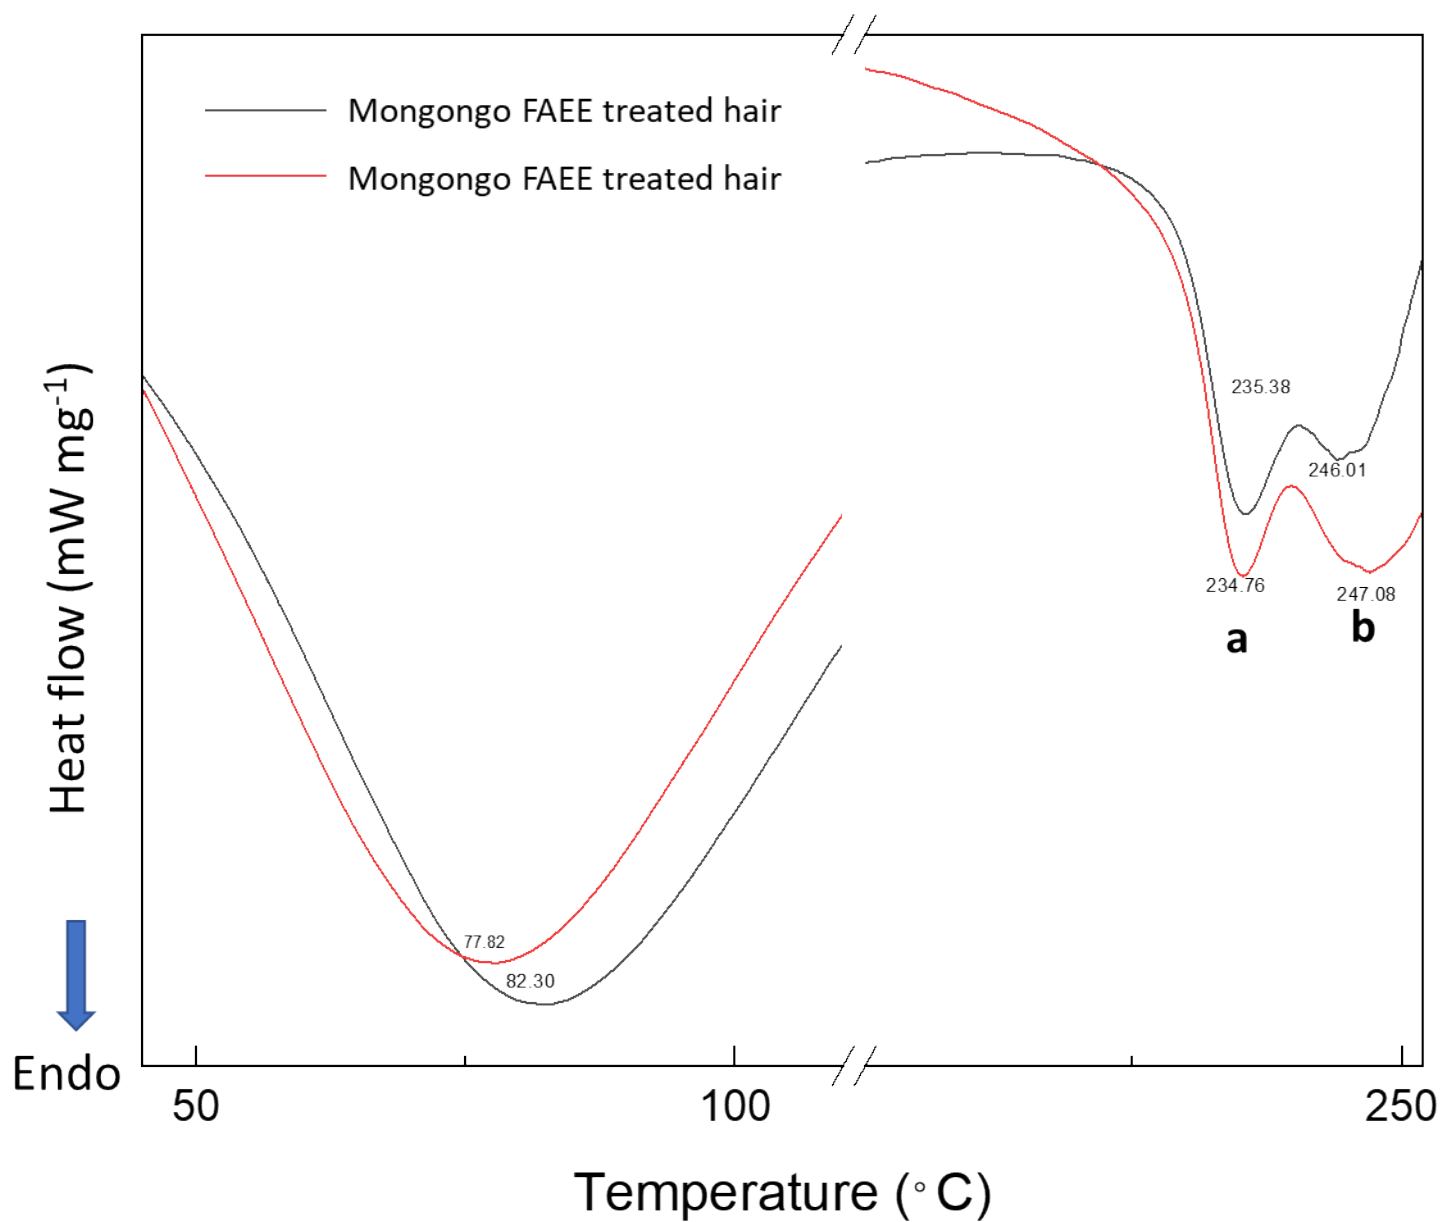

**Figure S2.** Comparison of DSC of hair treated with Mongongo FAEE and Mongongo oil.

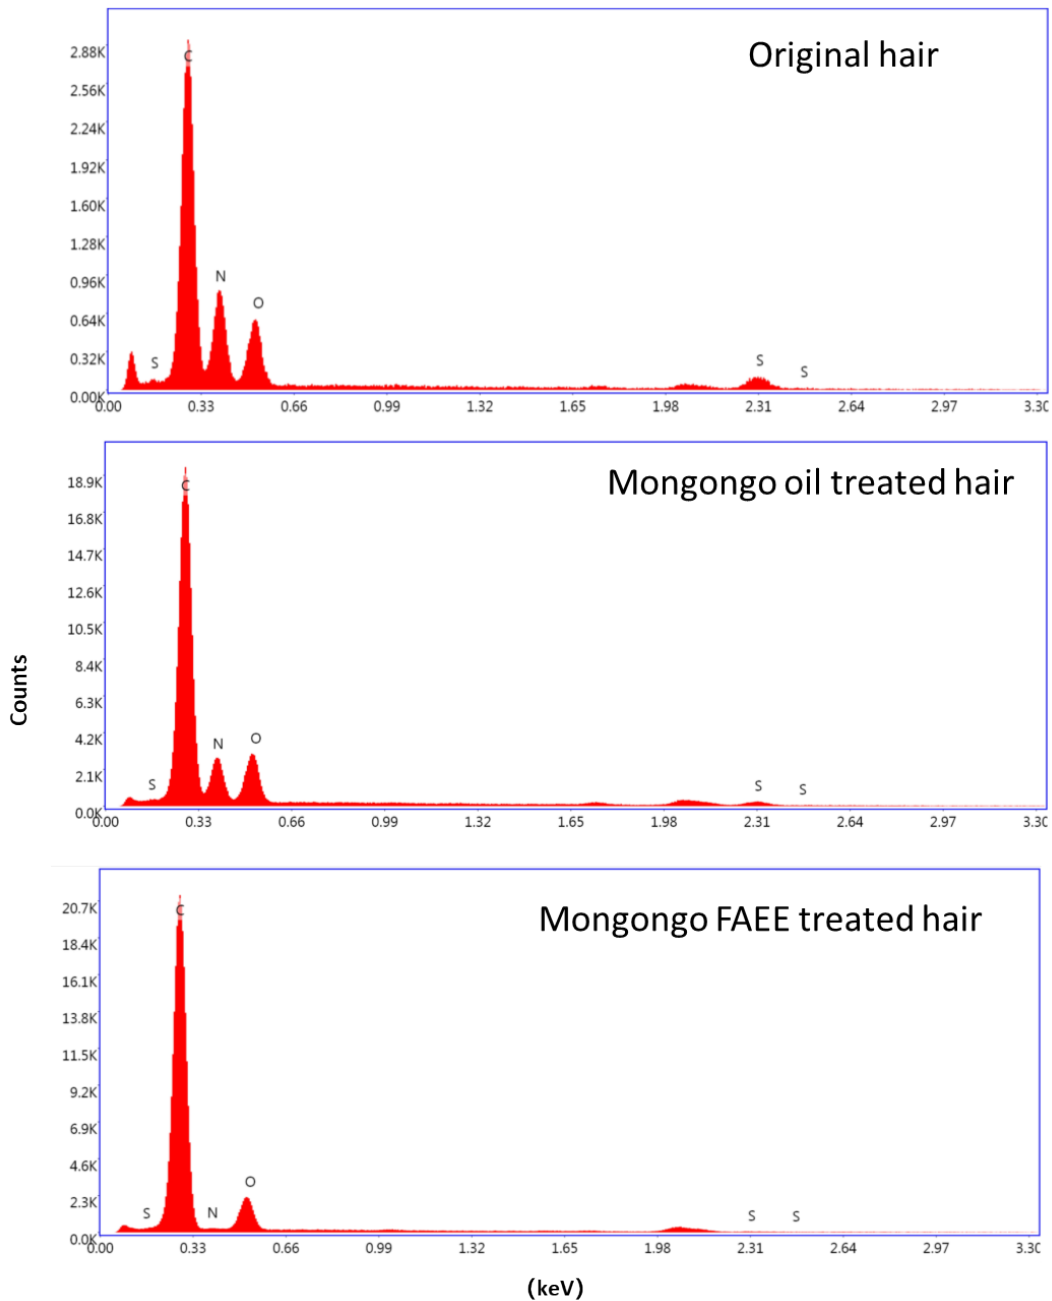

**Figure S3.** SEM-EDX of hair treated with Mongongo FAEE: C, N, O, and S elemental distribution on hair surface after the treatment.

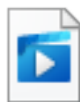

hair.mp4

**Vedio 1.** Hair after 8 hours of sunlight treatment. From left to right, hair without oil/FAEE, hair with Mongongo oil, hair with Mongongo FAEE.
